# Supplementary material for: Transgenerational transmission of hedonic behaviors and metabolic phenotypes induced by maternal overnutrition
Source: PubMed Central journal article supplement (PMC6185972; doi:10.1038/s41398-018-0243-2), 2018-10-12
Supplement: 41398_2018_243_MOESM1_ESM.pdf [file 41398_2018_243_MOESM1_ESM.pdf]

1 SUPPLEMENTARY INFORMATION

2

3 **Transgenerational transmission of hedonic behaviors and metabolic**  
4 **phenotypes induced by maternal overnutrition.**

5

6

7 **Authors**

8 <sup>1</sup>Gitalee Sarker, <sup>2</sup>Rebecca Berrens, <sup>1</sup>Judith von Arx, <sup>3</sup>Pawel Pelczar, <sup>2</sup>Wolf Reik, <sup>1</sup>Christian  
9 Wolfrum, <sup>1\*</sup>Daria Peleg-Raibstein

10

11

12

13 **Affiliations**

14 <sup>1</sup>Laboratory of Translational Nutrition Biology, Department of Health Sciences and Technology,  
15 ETH Zurich, Schwerzenbach 8603, Switzerland.

16 <sup>2</sup>The Babraham Institute, Babraham, Cambridge CB223AT, United Kingdom.

17 <sup>3</sup>Center for Transgenic Models, University of Basel, Basel, Switzerland.

18

19 \*Correspondence to: [daria-peleg@ethz.ch](mailto:daria-peleg@ethz.ch)

20

21

## 22 SUPPLEMENTARY MATERIALS AND METHODS

23

### 24 Experimental Design

25 The sample size selection, breeding and the experiments were designed according to the  
26 ARRIVE guidelines <sup>1</sup>. Random allocation of mice was conducted during breeding as well as  
27 during each experiment to exclude the selection bias. C57BL6/N mice obtained from Charles  
28 River, Germany were selected for breeding at the age of 10 weeks. To generate F1 offspring,  
29 40 female mice were randomly divided into two groups (20 in each group) and were exposed  
30 to HFD or chow diet for 9 weeks (3 weeks preconception, 3 weeks gestation and 3 weeks  
31 lactation). 20 male breeders were randomly chosen and allocated as one male per 2 female  
32 breeders during the mating. To generate F2 and F3 offspring, 12 behaviorally naïve adult F1  
33 males from HFD and CTR groups were randomly selected (one male per litter to exclude the  
34 litter effect) and mated with naïve primiparous females. All F2 and F3 animals were bred in  
35 identical breeding conditions. In each experiment, mice from multiple independent litters  
36 (one offspring per 10 different dams) were selected in each group to avoid the litter effect.  
37 Both male and female mice were chosen to assess the sex effects <sup>2</sup>. Behaviorally naïve mice  
38 were randomly allocated for each experiment (hedonic, metabolic, neuroanatomical and  
39 neurochemistry). Initially, the body weight of all offspring (F2 and F3) were measured since  
40 weaning to adulthood (PND 91). In both F2 and F3 generations, HFD preference test, sucrose  
41 preference test and alcohol preference test were conducted chronologically with 20 HFD (10  
42 male and 10 female) and 20 CTR (10 male and 10 female) offspring. For the amphetamine  
43 sensitivity test, a separate group of mice (12 in each treatment group; 6 male and 6 female  
44 per group) was selected in both generations. Similarly, CPP test was performed in a different  
45 group of F2 and F3 offspring (24 mice in each HFD and control group). To assess the metabolic

46 parameters, a separate group of mice in both generations was allocated and the experiments  
47 were conducted in following orders: CT scan, metabolic cage study, and insulin sensitivity test  
48 and plasma insulin and lipid profiles. The behavioral and metabolic experiments were not  
49 blindly conducted. All the behavioral experiments (except CPP) and the metabolic  
50 experiments were replicated two times in two independently generated F2 as well as F3  
51 cohorts. For neuroanatomical, neurochemical analysis and methylation assays, samples were  
52 collected from behaviorally naïve mice. For neuroanatomical analysis, 32 F2 offspring (16 HFD  
53 and 16 CTR) and 36 (18 HFD and 18 CTR) F3 offspring were used. For postmortem HPLC, 40  
54 F2 (20 mice per group) and 36 F3 (18 mice per group) offspring were chosen. To perform  
55 sperm methylation assay, 12 F1 (6 HFD and 6 CTR) and 12 F2 (6 HFD and 6 CTR) fathers were  
56 selected. These experiments were blindly performed since each sample was recognized by a  
57 number throughout the experiment up to the raw data analysis. The samples were allocated  
58 in to the respected groups in the final statistical analysis.

59

#### 60 **Fat composition assay**

61 Body fat composition was measured using a CT scanner (La Theta LCT-100; Aloka Inc, Japan).  
62 The scanner measures the volumes of adipose tissue, bone, air and the rest using differences  
63 in X-ray density. The X-ray source was set at 50 kV with a constant 1mA current. A mouse  
64 holder with an outer diameter of 48 mm and inner diameter of 41 mm was used, resulting in  
65 pixel resolutions of 100  $\mu$ m on 480  $\times$  480 pixel images. A pitch size of 1 mm was used. Mice  
66 were sedated by 4-5% isoflurane and maintained under gas anesthesia (1.5-2.5% isoflurane)  
67 while scanning. Animals were placed in supine position in the holder. The scan speed was set  
68 to 4.5 s/ image. A whole body scan excluding the head and the tail was performed for 5 min.  
69 Recorded scans were analyzed using the software La Theta 2.10.

## 70 **Metabolic cage study**

71 Metabolic phenotyping was performed in the TSE Phenomaster cages (TSE Systems GmbH,  
72 Bad Homburg, Germany). The TSE Phenomaster cages comprised of an indirect calorimetry  
73 system connected to a gas sensing unit to measure O<sub>2</sub> consumption (VO<sub>2</sub>) and CO<sub>2</sub>  
74 production (VCO<sub>2</sub>). A multi-dimensional infrared beam system assessed the locomotor  
75 activity as the total number of beam breaks in X and Y axis. Mice were single housed for 2  
76 days prior to the experiment for acclimatization to the new cage environment. Room  
77 temperature was set to 23 °C; the light/dark cycle in the room was 12:12 h (lights off at 07:00  
78 and lights on at 19:00). Mice were separately placed in the TSE Phenomaster cages and had  
79 ad libitum access to food and water. Mice were monitored for a total of 3 days. Body weight  
80 of each animal was measured before and after the experiment. O<sub>2</sub> consumption and CO<sub>2</sub>  
81 production were calculated from the gas concentrations and the air flow through the  
82 individual cage measured in parallel. Heat production, locomotor activity and food intake  
83 were also monitored during this period. Data were analyzed with Phenomaster software.

## 84 **Amphetamine-induced locomotor activity**

85 The locomotor response to a systemic amphetamine administration was tested in an open  
86 field apparatus. First, the mice were allowed to habituate to the open-field arena for 30 min  
87 (baseline). Then, they were administered an i.p. injection of saline (0.9% NaCl solution) and  
88 locomotor activity was measured for 30 min. The mice were then administered 2.5 mg/kg  
89 (i.p.) d-amphetamine sulphate (AMPH, Sigma-Aldrich, Switzerland) dissolved in 0.9% NaCl  
90 saline. The mice were placed back in the open field arena and the locomotor response to the  
91 acute drug challenge was measured for an additional 120 min. The locomotor activity was  
92 indexed by the distance travelled in the entire arena, expressed as a function of 12 successive

93 10 min bins. All solutions for injection were prepared on the day of experiment and were  
94 administered in a volume of 5 ml/kg body weight.

### 95 **Conditioned place preference (CPP)**

96 The CPP chamber consisted of two equally sized compartments with different colored walls  
97 and distinct floor textures that were separated by a small central area. A digital camera was  
98 directly mounted above the CPP apparatus which captured images at a rate of 5 Hz and  
99 transmitted them to the Ethovision tracking system (Noldus Technology). The distance  
100 travelled and total time spent in each compartment were recorded by the Ethovision  
101 software. The experiment consisted of three phases. During the pre-conditioning phase, all  
102 mice were allowed to freely explore all the compartments for 15 min. The conditioning phase  
103 lasted for eight days where the mice were conditioned to either cocaine or saline. During the  
104 conditioning phase, half of the animals from each group received the drug or vehicle in one  
105 compartment while the other half received it in the other compartment. During each of the  
106 four saline conditioning days (Day 1, 3, 5 and 7), an intraperitoneal (i.p.) injection of saline  
107 (0.9% NaCl) was administered to the mice immediately prior to confinement to the vehicle  
108 paired compartment for 30 min. On each of the four cocaine conditioning days (Day 2,4,6  
109 and 8), mice received an i.p. injection of cocaine hydrochloride (Sigma–Aldrich, Switzerland)  
110 at a dose of 20 mg/kg before confining the mice to the drug-paired chamber for 30 min. The  
111 central area was made inaccessible by doors during conditioning. On the third phase, the  
112 preference test, took place 48 hours after the last conditioning day, the mice were again given  
113 free access to the entire apparatus without any injection for 30 min. The total time spent in  
114 each compartment was recorded during this period.

### 115 **Dissection of brain regions**

116 Adult mice from both groups were euthanized, the brains were rapidly removed, and 1 mm  
117 thick coronal sections were made. The slices were placed on an ice-chilled dissection plate for  
118 the extraction of the brain regions using a 1 mm micropunch. All brain areas of interest were  
119 dissected according to the Mouse Brain Atlas in Stereotaxic Coordinates (Paxinos and  
120 Franklin, 2008) which were as follows: dSTR (bregma +1.34 to +0.14 mm), Nac (bregma +1.60  
121 to +0.98 mm), mPFC (bregma +2.68 to +1.94mm), Hypo (bregma -1.34 to -2.06mm), SN  
122 (bregma -2.80 to -3.64 mm), VTA (bregma -2.92 to -3.64 mm), Amyg (bregma from -0.94  
123 mm to -2.30 mm), V. hip (bregma -2.54 to -3.80 mm) and D. hip (bregma -1.22 to -2.46 mm)  
124 and immediately frozen at -80°C.

#### 125 **Gene expression analysis of deltaFosB**

126 The expression of delta FosB in dSTR and Nac of HFD and CTR offspring following chronic  
127 cocaine exposure was assessed by quantitative real time PCR (q-RT PCR). Total RNA from brain  
128 tissue was extracted using the Trizol-chloroform method (Invitrogen, CA, USA) according to  
129 the manufacturer's instruction and treated with DNase (Biolabs INC, CA, USA) for 30 min at  
130 37°C. Following RNA extraction, 1µg of total RNA was converted to cDNA using High  
131 Capacity cDNA Reverse Transcription Kit [Applied Biosystems (ABI), Foster City, CA]. The  
132 qPCR reactions were performed using the SYBER Green master mix (ABI) in the presence of  
133 primer pairs specific for the gene encoding for ΔFOSB. Endogenous control m36B4 was used  
134 to normalize the expression of the selected genes. Real time PCR reactions were conducted  
135 as follows: after a pre-denaturation and polymerase-activation program (5min at 95°C),  
136 forty cycles each consisting of 95°C for 3 sec and 60°C for 30 sec were followed by a melting  
137 curve program (60 to 95°C with heating rate of 0.1°C/sec). The relative expression of mRNA  
138 was calculated using the 2- ΔΔCt method<sup>1</sup>. All primers were purchased from Microsynth AG,  
139 Switzerland. The primers used were as follows: ΔFOSB (forward, 5`-

140 AGGCAGAGCTGGAGTCGGAGAT-3` ; reverse, 5`-GCCGAGGACTTGAACTTCACTCG-3`) and m36B4  
141 (forward, 5`-GCCGTGATGCCAGGGAAGA-3` ; reverse, 5`-CATCTGCTTGGAGCCCACGTT-3`).

## 142 **Immunohistochemistry**

143 Adult behaviorally naïve mice were deeply anaesthetized and perfused transcardially with  
144 phosphate buffer solution (PBS), followed by fixation with 4% phosphate-buffered  
145 paraformaldehyde solution containing 5% sucrose. After overnight fixation in the same  
146 fixative, the brains were cryoprotected using 30% sucrose solution and stored at 4°C. Later,  
147 the brains completely embedded in the cryomatrix (O.C.T; Thermo Scientific) were cut  
148 coronally at 40 µm thickness. The slices were first rinsed three times in PBS and then  
149 incubated with 0.5% H<sub>2</sub>O<sub>2</sub> for 30 min. Later, the slices were incubated with 50mM  
150 ammonium chloride and subsequently with 50mM glycine buffer, for 30 min each. The  
151 sections were incubated overnight at 4°C in primary antibody diluted in 0.5M Tris buffer, pH  
152 8.0 containing 0.3% Triton X-100 and 4% normal goat serum. The following primary antibodies  
153 were used: rabbit anti-tyrosine hydroxylase (TH) (Santa Cruz Biotechnology sc14007; diluted  
154 1:500), rat anti dopamine transporter (DAT) (Chemicon MAB369; diluted 1:1000), rat anti-  
155 dopamine D1 receptor (D1R) (Sigma Aldrich D2944; diluted 1:1000) and rabbit anti-dopamine  
156 D2 receptor (D2R) (Chemicon AB5084P; diluted 1:500). After overnight incubation with  
157 primary antibody and three washing steps in 0.1 M PB, the sections were incubated at room  
158 temperature for 1 h with the biotinylated secondary antibodies (Jackson Immunoresearch:  
159 diluted 1:500). The slices were then incubated in avidin-biotin-peroxidase complex  
160 (Vectastain PK6100 standard kit; Vector Laboratories) for 30 min. After three washing steps  
161 in 0.1 M PB, the sections were incubated for 5 min with 0.05% 3,3-diaminobenzidine (DAB),  
162 0.03% Nickel ammonium sulfate and 0.02% H<sub>2</sub>O<sub>2</sub> diluted in 0.05M Tris buffer (pH 8.0). After  
163 immunotaining, the sections were dehydrated, and cover slipped with DPX mountant.

164 **Densitometry**

165 Microscopic analysis was conducted under strictly blind conditions. Images were acquired at  
166 a magnification of 2.5× (NA 0.075) using a digital camera (Axiocam MRc5; Zeiss, Jena,  
167 Germany) attached to a Zeiss Axioplan microscope. Images were loaded into Image J software  
168 (ImageJ, NIH, Maryland, USA) for analysis. The pixel brightness was measured in non-  
169 immunoreactive areas of the forceps minor of the corpus callosum (for prefrontal cortical  
170 measures), corpus callosum (for dorsal striatal measurements) and anterior commissure (for  
171 nucleus accumbens' measures) as background area. The background-corrected relative  
172 optical densities were measured per brain region. Quantification was performed in four to six  
173 coronal brain sections and then averaged per brain area and animal.

174 **Steriological analysis**

175 The number of TH-positive neurons was determined by means of unbiased stereological  
176 estimations using the optical fractionator method. With the aid of the image analysis software  
177 Stereo Investigator (version 6.50.1; MicroBrightField), every section of a one-in-eight series  
178 was measured, resulting in an average of 5-6 sections per brain sample. The sampling  
179 parameters used were as follows: VTA (counting frame, grid size, sampling site=50um×50um,  
180 120×130, 10; respectively) and SN (counting frame, grid size, sampling site=50um×50um,  
181 150×110, 20; respectively). The counting frames were placed randomly at the intersections  
182 of the grid within the outlined structure of interest by the software. The cells were counted  
183 at the magnification of 20× [numerical aperture (NA), 0.40] according to the unbiased  
184 sampling rules and taken into the measurement when they came into focus within the optical  
185 dissector.

186 **Post mortem HPLC**



187 The brain regions isolated from adult mice were suspended in 0.4 M perchloric acid, sonicated  
188 and centrifuged at 10,000×g for 20 min at 4 °C. The supernatant was then collected, filtered  
189 and stored at -80 °C. The levels of dopamine (DA) and its metabolites DOPAC and HVA were  
190 measured by a high performance liquid chromatography (HPLC) system as previously  
191 described <sup>3</sup>. The sample (20 µl from each brain region) was injected by a refrigerated auto  
192 injector (ASI-100, Dionex, CA, USA). The HPLC mobile phase contained: 250 ml HPLC- grade  
193 acetonitrile, 5l aqueous solution having 0.27mM sodium ethylene-di-ammonium-tetra  
194 acetate (C<sub>10</sub>H<sub>14</sub>N<sub>2</sub>O<sub>8</sub>Na<sub>2</sub>•2H<sub>2</sub>O), 0.43mM triethylamine (C<sub>6</sub>H<sub>15</sub>N), 8 mM potassium  
195 chloride, and 0.925 mM octanesulphonic acid (C<sub>8</sub>H<sub>17</sub>O<sub>3</sub>SNa), at pH 2.95. The mobile phase  
196 was passed through the system using a degasser at a flow rate of 0.4ml/min.  
197 Neurotransmitters were separated on a reversed-phase column (125mm×3mm YMC column,  
198 Nucleosil 120-3 C 18, YMC Europe GmbH, Germany) and the concentrations were detected  
199 using the electrochemical detector at an electrode potential of +0.70V. Data acquisition and  
200 calculations were performed using a chromatography workstation (Chromeleon, Dionex,  
201 Olten, Switzerland). Sample analysis was performed based on the position and height of the  
202 peaks of the endogenous components in relation to the samples of calibrating standard  
203 solutions.

#### 204 **Bisulfite sequencing analysis**

205 Raw sequence reads were trimmed to remove both poor quality calls and adapters using Trim  
206 Galore (v0.4.1, [www.bioinformatics.babraham.ac.uk/projects/trim\\_galore/](http://www.bioinformatics.babraham.ac.uk/projects/trim_galore/), Cutadapt version  
207 1.8.1, parameters: –paired). Trimmed reads were aligned to the mouse genome (GRCm38) in  
208 paired-end mode to be able to use overlapping parts of the reads only once. Alignments were  
209 carried out with Bismark v0.14.419 with the following set of parameters: paired-end mode: –  
210 pbat. Reads were then deduplicated with deduplicate\_bismark selecting a random alignment

211 for position that was covered more than once. CpG methylation calls were extracted from the  
212 deduplicated mapping output, ignoring the first 6 bp of each read to reduce the methylation  
213 bias typically observed in PBAT libraries using the Bismark methylation extractor (v0.14.4)  
214 with the following parameters (i) paired-end mode: `-ignore 6 -ignore_r2 6`, (ii) single-end  
215 mode: `-ignore 6`. CpG methylation calls were analyzed using R and SeqMonk software  
216 (<http://www.bioinformatics.babraham.ac.uk/projects/seqmonk/>). 50 adjacent CpG running  
217 window probes were generated and percentage of methylation determined for probes  
218 containing at least five reads and three CpG on the pooled replicate data. The methylation  
219 level was expressed as the mean of individual CpG sites. Global CpG methylation levels of  
220 pooled replicates were illustrated using bean plots. Promoters were defined as the region -1  
221 kb to the transcription start site as annotated in NCBI37. For analysis of specific genome  
222 features these were defined as follows: Genic (overlapping coding sequences) were divided  
223 into exonic and intronic, CpG islands (CGI), promoters were defined as 1000 bp upstream of  
224 mRNAs, genic (overlapping coding sequences) were divided into exonic and intronic, repeat  
225 locations were extracted from the pre-masked RepeatMasker libraries (mm10 - Dec 2011 -  
226 RepeatMasker open-4.0.5, <http://www.repeatmasker.org/species/musMus.html>). Repeat  
227 instances overlapping annotated genes in the Ensembl gene set were removed to avoid  
228 mixing signals from genic expression with specific expression of repetitive sequences.  
229 Enhancers were taken from the super enhancers defined in ES cells. Graphing and statistics  
230 were performed using Seqmonk and RStudio.

### 231 **In vitro fertilization**

232 Spermatozoa extracted from HFD and CTR-F1 males were used to fertilize oocytes isolated  
233 from superovulated C57BL/6 females. The females at PND 28 were superovulated by i.p.  
234 injection of 5 IU of equine chorionic gonadotropin (PMSG) and 5 IU of human chorionic

235 gonadotropin (hCG) with the PMSG injection timed at 18:00 on day 1 and hCG at 18:00 on day  
236 3, respectively. Next day, males were sacrificed, the dense sperm was removed from cauda  
237 epididymis and capacitated in 200ul of Fertiuip medium (Cosmo Bio) for 45 minutes at 37°C.  
238 Following capacitation, 2ul of sperm solution was added to the IVF drop which comprised of  
239 100 ul HTF medium (Cosmo Bio) overlaid with embryo tested mineral oil (Sigma). Females  
240 were then sacrificed, the oviducts were dissected immediately and the oocyte clutches were  
241 released directly into the IVF drop. The IVF reaction was conducted for 4 hours at 37°C.  
242 Following the IVF reaction, the efficiency of fertilization was confirmed by the presence of the  
243 pronuclei and the 2nd polar body. Fertilized oocytes were surgically transferred into  
244 pseudopregnant CD1 foster females previously mated with genetically vasectomized  
245 Prnm1GFP males and allowed to develop to term.

246

## 247 **SUPPLEMENTARY FIGURE TITLES AND LEGENDS**

### 248 **Supplementary Figure 1. Hedonic responses to natural rewards.**

249 (a) and (b) show the HFD preference in F2 and F3 generation respectively. The bar plots depict  
250 the consumption of HFD and chow diet per day normalized to body weight. (c) and (d)  
251 represent the sucrose preference in F2 and F3 offspring respectively. The bar plots show the  
252 mean sucrose consumption per day normalized to body weight in three different  
253 concentrations (0.5%, 1% and 3%). Data are represented as mean  $\pm$  SEM. \*\*\*p< 0001. N (F2  
254 CTR) = 20 (10 m, 10 f); N (F2 HFD) = 20 (10 m, 10 f); N (F3 CTR) = 20 (10 m, 10 f); N (F3 HFD) =  
255 20 (10 m, 10 f); m = male, f = female.

### 256 **Supplementary Figure 2. Sensitization to cocaine in the F2 and F3 offspring.**

257 (a) and (b) represent the cocaine induced locomotor activity in F2 and F3 offspring

258 respectively. The line plots show the distance travelled (cm) in successive 5 min bins on the  
259 first day and following 21 days of cocaine withdrawal in response to a systemic injection of  
260 cocaine in the CPP paradigm. Data are represented as mean  $\pm$  SEM. \* $p$ <0.05. N (F2 CTR) = 24  
261 (12 m, 12 f); N (F2 HFD) = 24 (12 m, 12 f); N (F3 CTR) = 24 (12 m, 12 f); N (F3 HFD) = 24 (12 m,  
262 12 f). m= male, f = female. (See also Figure 2).

263 **Supplementary Figure 3. Neuroanatomical alterations in the dopaminergic system of the F2**  
264 **and F3 offspring.**

265 (a-h) show the representative images of coronal brain sections of F2 and F3 offspring for the  
266 expression of D1R in the dSTR and Nac. D1R = dopamine receptor 1, dSTR = dorsal striatum,  
267 Nac = nucleus accumbens, (See also Figure 3).

268 **Supplementary Figure 4. Levels of dopamine (DA) and its metabolites (DOPAC and HVA) in**  
269 **post mortem brain tissue of the F2 offspring.**

270 (a) shows the content of DA in the Hypo, mPFC, SN, Amyg, V. hip and D. hip in the F2 offspring.  
271 (b) and (c) display the levels of DOPAC in the dSTR, Nac, VTA as well as Hypo, mPFC, SN, Amyg,  
272 V. hip and D. hip respectively. (d) and (e) display the levels of HVA in the dSTR, Nac, VTA as  
273 well as Hypo, mPFC, SN, Amyg, V. hip and D. hip respectively. All monoamines contents are  
274 expressed as ng per mg fresh tissue weight. Data are represented as mean  $\pm$  SEM. N (F2 CTR)  
275 = 20 (10 m, 10 f); N (F2 HFD) = 20 (10 m, 10 f). DA = dopamine, DOPAC = 3,4-  
276 Dihydroxyphenylacetic acid, HVA = homovanillic acid, dSTR = dorsal striatum, Nac = nucleus  
277 accumbens, VTA = ventral tegmental area, Hypo = hypothalamus, SN = substantia nigra, Amyg  
278 = amygdala, mPFC = medial prefrontal cortex, V. hip = ventral hippocampus and D. hip = dorsal  
279 hippocampus. m = male, f = female. (See also Figure 3).

280 **Supplementary Figure 5. Levels of dopamine (DA) and its metabolites (DOPAC and HVA) in**

281 **post mortem brain tissue of the F3 offspring.**

282 (a) shows the content of DA in the Hypo, mPFC, SN, Amyg, V. hip and D. hip in the F3 offspring.  
283 (b) and (c) display the levels of DOPAC in the dSTR, Nac, VTA as well as Hypo, mPFC, SN, Amyg,  
284 V. hip and D. hip respectively. (d) and (e) display the levels of HVA in the dSTR, Nac, VTA as  
285 well as Hypo, mPFC, SN and Amyg respectively. All monoamines contents are expressed as ng  
286 per mg fresh tissue weight. Data are represented as mean  $\pm$  SEM. N (F3 CTR) = 18 (9 m, 9 f);  
287 N (F3 HFD) = 18 (9 m, 9 f). DA = dopamine, DOPAC = 3,4-Dihydroxyphenylacetic acid, HVA =  
288 homovanillic acid, dSTR = dorsal striatum, Nac = nucleus accumbens, VTA = ventral tegmental  
289 area, Hypo = hypothalamus, SN = substantia nigra, Amyg = amygdala, mPFC = medial  
290 prefrontal cortex, V. hip = ventral hippocampus and D. hip = dorsal hippocampus. m = male, f  
291 = female. (See also Figure 3).

292 **Supplementary Figure 6. Altered metabolic phenotypes in the F2 and F3- HFD offspring.**

293 (a) and (b) represent the total fat mass, subcutaneous and visceral fat depot in F2 and F3  
294 offspring respectively. (c) and (d) display the area under the curve (AUC) for the insulin  
295 sensitivity test in the F2 and F3 offspring respectively. (e) and (f) show the concentration of  
296 triglycerides and free fatty acid (FFA) in the F2 and F3 offspring respectively. Data are  
297 represented as mean  $\pm$  SEM. \* $p < 0.05$ , \*\* $p < 0.01$ . N (F2 CTR) = 12 (6 m, 6 f); N (F2 HFD) = 12 (6  
298 m, 6 f); N (F3 CTR) = 12 (6 m, 6 f); N (F3 HFD) = 12 (6 m, 6 f). m = male, f = female. (See also  
299 Figure 4).

300 **Supplementary Figure 7. Metabolic cage study in the F2 generation.**

301 The bar plots represent average O<sub>2</sub> consumption (a), average CO<sub>2</sub> production (b), mean heat  
302 production (c), respiratory exchange ratio, RER (VCO<sub>2</sub>/VO<sub>2</sub>) (d) and physical activity (e) in 12  
303 h dark and light cycle. The food intake per day was normalized to body weight (f). Data are

304 represented as mean  $\pm$  SEM. \* $p < 0.05$ , \*\* $p < 0.01$ . N (F2 CTR) = 12 (6 m, 6 f); N (F2 HFD) = 12 (6  
305 m, 6 f). m = male, f = female. (See also Figure 4).

306 **Supplementary Figure 8. Metabolic cage study in the F3 generation.**

307 The bar plots depict average O<sub>2</sub> consumption (a), average CO<sub>2</sub> production (b), mean heat  
308 production (c), respiratory exchange ratio, RER (VCO<sub>2</sub>/VO<sub>2</sub>) (d) and physical activity (e) in 12  
309 h dark and light cycle. The food intake per day was normalized to body weight (f). Data are  
310 represented as mean  $\pm$  SEM. \* $p < 0.05$ . N (F3 CTR) = 12 (6 m, 6 f); N (F3 HFD) = 12 (6 m, 6 f). m  
311 = male, f = female. (See also Figure 4).

312 **Supplementary Figure 9. Amphetamine induced locomotor activity in the IVF offspring.**

313 The line plots show the distance travelled (cm) in successive 10 min bins following baseline,  
314 saline and a systemic injection of amphetamine in the open field. Data are represented as  
315 mean  $\pm$  SEM. \* $p < 0.05$ . N (F2 CTR) = 16 (8 m, 8 f); N (F2 HFD) = 16 (8 m, 8 f); N (F3 CTR) = 16 (8  
316 m, 8 f); N (F3 HFD) = 16 (8 m, 8 f). m = male, f = female.

317 **Supplementary Figure 10. Spem CpG methylation changes in F1 and F2 offspring.**

318 (a) and (b) show the percentage of F2 DMRs found between F1 CTR and F1 HFD and F1 DMR  
319 found between F2 CTR and F2 HFD. The size of the dot represents the size of the DMR and  
320 the blue color scale indicates the p-value of the DMR.

321

322 **REFERENCES**

323 1. Kilkenny C, Browne WJ, Cuthill IC, Emerson M, Altman DG. Improving bioscience research  
324 reporting: the ARRIVE guidelines for reporting animal research. *PLoS biology* 2010; **8**(6):  
325 e1000412.

326  
327 2. Beery AK, Zucker I. Sex bias in neuroscience and biomedical research. *Neurosci Biobehav Rev*  
328 2011; **35**(3): 565-572.

329

330
